# Supplementary material
Source: publisher site journal article supplement (https://www.spandidos-publications.com/846/downloadSupplementary)

Figure SI. Difference in  $\beta$ -values of the 17 CpG sites of the methylation-based classifier between colon adenocarcinoma and normal adjacent tissues.

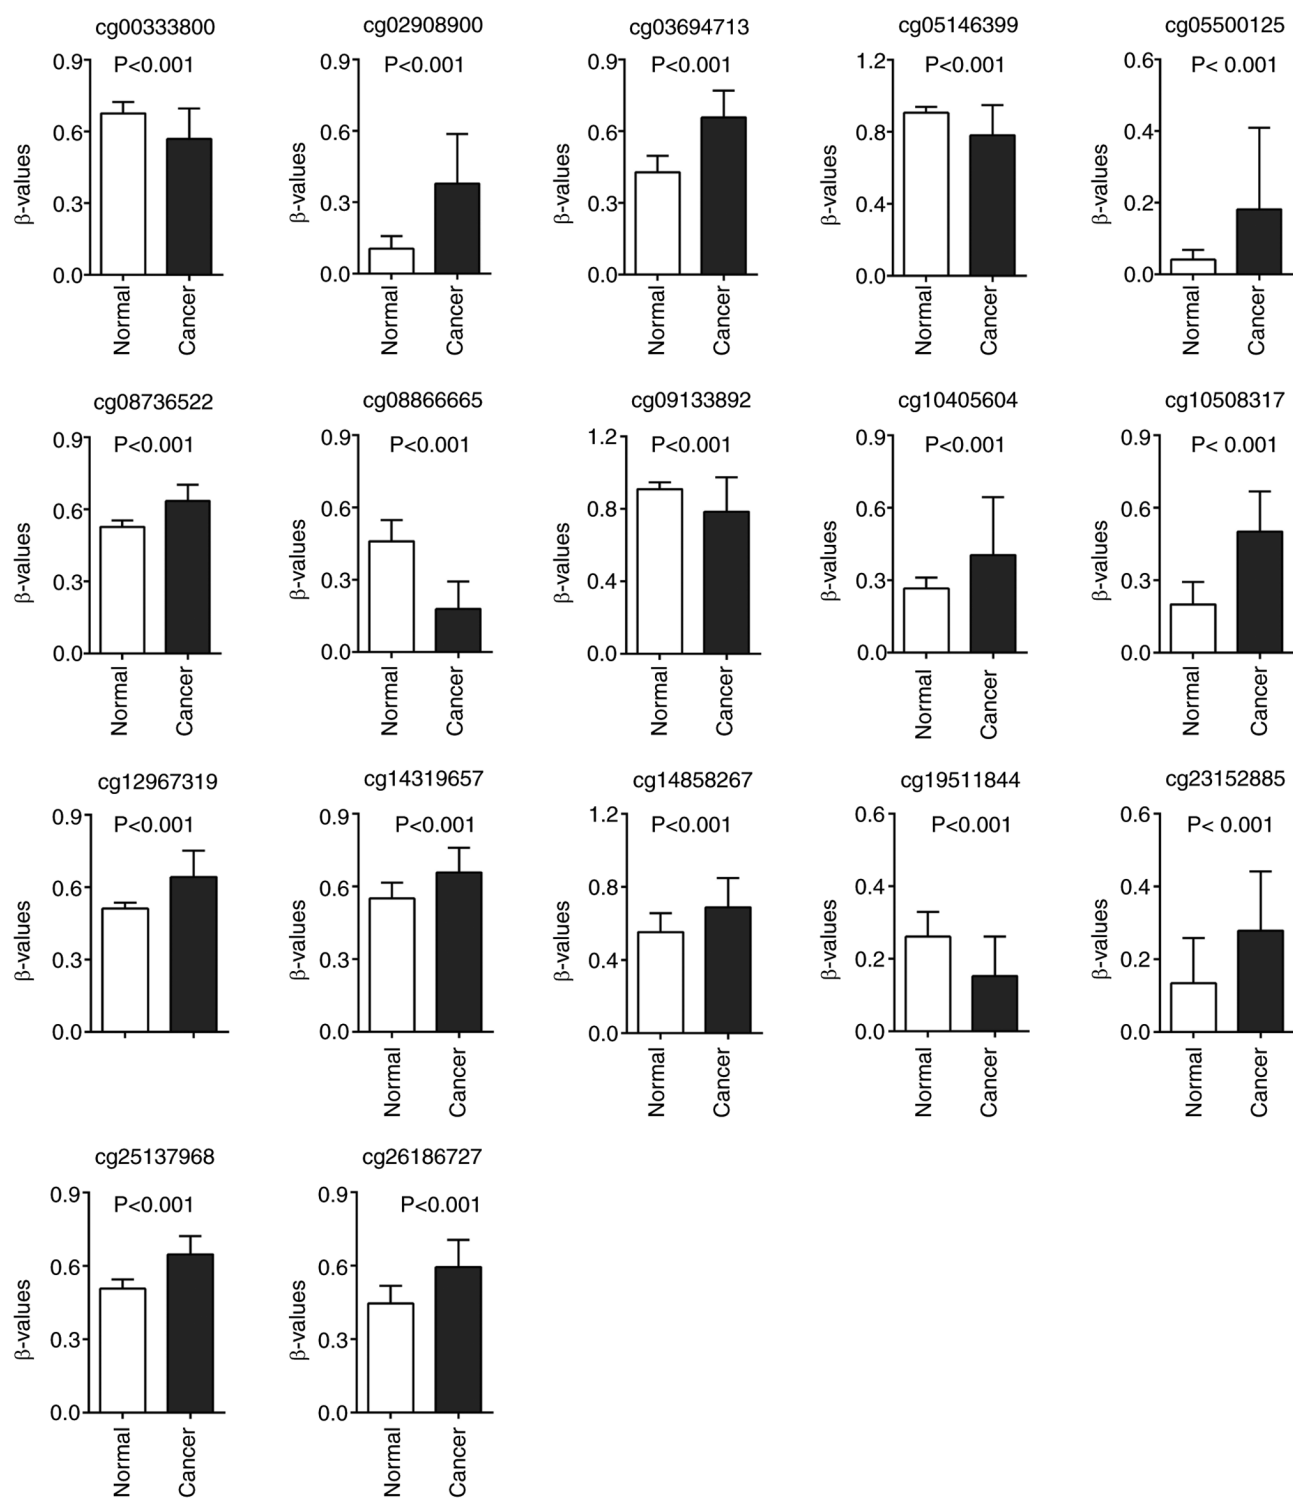

Supplement: Supplementary file 1 [file downloadSupplementary]
